# Supplementary material for: Hesperidin Bioavailability Is Increased by the Presence of 2S-Diastereoisomer and Micronization—A Randomized, Crossover and Double-Blind Clinical Trial
Source: MDPI journal article supplement (doi:10.3390/nu14122481), 2022-06-15
Supplement: s1 [file s1]

**Table S1.** Baseline characteristics and relative urinary hesperidin values of participants in the first phase of the study.

| <b>Variable</b>                          | <b>Mean <math>\pm</math> SD</b> |
|------------------------------------------|---------------------------------|
| Age, <i>years</i>                        | 41.9 $\pm$ 12.4                 |
| Females, %                               | 43.8%                           |
| Systolic blood pressure, <i>mm Hg</i>    | 121 $\pm$ 12.4                  |
| Diastolic blood pressure, <i>mm Hg</i>   | 75 $\pm$ 10.2                   |
| Weight, <i>kg</i>                        | 75.5 $\pm$ 14.7                 |
| Body mass index, <i>kg/m<sup>2</sup></i> | 26.1 $\pm$ 4.08                 |
| Waist circumference, <i>cm</i>           | 89.3 $\pm$ 13.7                 |
| Glucose, <i>mg/dL</i>                    | 92.6 $\pm$ 11.2                 |
| Cholesterol, <i>mg/dL</i>                |                                 |
| Total                                    | 184 $\pm$ 43.9                  |
| LDL                                      | 110 $\pm$ 35.9                  |
| HDL                                      | 59.7 $\pm$ 15.6                 |
| Triglycerides, <i>mg/dL</i>              | 82.1 $\pm$ 40.7                 |
| Hemoglobin, <i>g/dL</i>                  | 14.5 $\pm$ 0.951                |
| Creatinine, <i>mg/dL</i>                 | 0.919 $\pm$ 0.191               |
| Total bilirubin, <i>mg/dL</i>            | 0.719 $\pm$ 0.740               |
| Aspartate aminotransferase, <i>UI/L</i>  | 20 $\pm$ 4.24                   |
| Alanine aminotransferase, <i>UI/L</i>    | 21 $\pm$ 10                     |
| Gamma glutamyl transferase, <i>UI/L</i>  | 18.1 $\pm$ 11.0                 |
| Alkaline phosphatase, <i>UI/L</i>        | 64.3 $\pm$ 18.7                 |
| Thyrotropin, <i>mUI/mL</i>               | 1.89 $\pm$ 0.938                |
| Hesperidin excretion (%) (N=28)          | 2.67 $\pm$ 1.79                 |
| High excretors (N=4)                     | 6.06 $\pm$ 1.46                 |
| Intermediate excretors (%; N=21)         | 2.31 $\pm$ 1.01                 |
| Low excretors (%; N=3)                   | 0.743 $\pm$ 0.112               |

LDL, low density lipoproteins; HDL, high density lipoproteins. N=30.

**Table S2.** Quantities of Hesperidin metabolites and Hesperidin catabolites in urine before and after Hesperidin epimeric mixture (HEM) ingestion.

| Variable                                                    | 0 h                 | 0-3 h             | 3-6 h             | 6-8 h             | 8-24 h            |
|-------------------------------------------------------------|---------------------|-------------------|-------------------|-------------------|-------------------|
| <b>Metabolites, <math>\mu\text{mol}</math></b>              |                     |                   |                   |                   |                   |
| Hesperetin 7,3'-di-O-glucuronide                            | 0.001 $\pm$ 0.001   | 0.001 $\pm$ 0.001 | 0.046 $\pm$ 0.021 | 0.41 $\pm$ 0.11   | 2.79 $\pm$ 0.51   |
| Naringenin 7-O-glucuronide                                  | 0.017 $\pm$ 0.005   | 0.018 $\pm$ 0.005 | 0.007 $\pm$ 0.003 | 0.039 $\pm$ 0.010 | 0.17 $\pm$ 0.08   |
| Naringenin 4-O-glucuronide                                  | 0.033 $\pm$ 0.012   | 0.035 $\pm$ 0.011 | 0.006 $\pm$ 0.003 | 0.083 $\pm$ 0.028 | 0.34 $\pm$ 0.18   |
| Hesperetin 7-O-glucuronide                                  | 0.005 $\pm$ 0.002   | 0.007 $\pm$ 0.003 | 0.073 $\pm$ 0.033 | 0.68 $\pm$ 0.18   | 3.00 $\pm$ 0.53   |
| Hesperetin 3-O-glucuronide                                  | 0.025 $\pm$ 0.007   | 0.064 $\pm$ 0.005 | 0.46 $\pm$ 0.16   | 5.10 $\pm$ 1.99   | 23.3 $\pm$ 3.7    |
| Hesperetin 7-O-sulfate                                      | 0.002 $\pm$ 0.001   | 0.007 $\pm$ 0.000 | 0.033 $\pm$ 0.009 | 0.35 $\pm$ 0.10   | 1.52 $\pm$ 0.30   |
| Hesperetin                                                  | 0.0001 $\pm$ 0.0000 | 0.001 $\pm$ 0.000 | 0.001 $\pm$ 0.000 | 0.006 $\pm$ 0.002 | 0.092 $\pm$ 0.014 |
| <b>Catabolites, <math>\mu\text{mol}</math></b>              |                     |                   |                   |                   |                   |
| 2-Hydroxy-2-(4'-hydroxyphenyl)acetic acid                   | 1.38 $\pm$ 0.16     | 2.99 $\pm$ 0.34   | 2.77 $\pm$ 0.39   | 3.09 $\pm$ 0.35   | 13.7 $\pm$ 1.9    |
| 2-Hydroxy-2-(4'-hydroxy-3'-methoxyphenyl)acetic acid        | 1.09 $\pm$ 0.08     | 2.89 $\pm$ 0.23   | 1.76 $\pm$ 0.15   | 1.98 $\pm$ 0.27   | 9.38 $\pm$ 0.90   |
| 4'-Hydroxyhippuric acid                                     | 1.81 $\pm$ 0.24     | 3.65 $\pm$ 0.59   | 1.84 $\pm$ 0.19   | 3.51 $\pm$ 0.59   | 20.3 $\pm$ 2.5    |
| 3'-Hydroxyhippuric acid                                     | 5.14 $\pm$ 1.77     | 8.34 $\pm$ 3.40   | 1.89 $\pm$ 0.55   | 3.56 $\pm$ 2.28   | 31.9 $\pm$ 7.2    |
| 33-Hydroxy-3-(3'-hydroxyphenyl)propanoic acid               | 19.6 $\pm$ 8.0      | 29.0 $\pm$ 13.9   | 7.36 $\pm$ 2.64   | 18.0 $\pm$ 12.8   | 114 $\pm$ 26      |
| 3-(3'-hydroxyphenyl)propanoic acid-4'-sulfate               | 0.23 $\pm$ 0.03     | 0.48 $\pm$ 0.07   | 0.15 $\pm$ 0.03   | 0.18 $\pm$ 0.05   | 1.52 $\pm$ 0.22   |
| 3-(3'-hydroxyphenyl)propanoic acid-4'-glucuronide           | 0.028 $\pm$ 0.003   | 0.066 $\pm$ 0.005 | 0.058 $\pm$ 0.005 | 0.053 $\pm$ 0.004 | 0.54 $\pm$ 0.23   |
| 3-(4'-hydroxyphenyl)propanoic acid-3'-sulfate               | 0.57 $\pm$ 0.23     | 0.35 $\pm$ 0.14   | 0.15 $\pm$ 0.06   | 0.22 $\pm$ 0.17   | 3.72 $\pm$ 1.58   |
| Hippuric acid                                               | 24.4 $\pm$ 3.4      | 56.9 $\pm$ 9.2    | 40.0 $\pm$ 4.5    | 41.0 $\pm$ 6.4    | 193 $\pm$ 20      |
| 3-(4'-hydroxyphenyl)propanoic acid-3-glucuronide            | 0.14 $\pm$ 0.02     | 0.30 $\pm$ 0.04   | 0.15 $\pm$ 0.02   | 0.16 $\pm$ 0.03   | 1.28 $\pm$ 0.26   |
| 4'-Hydroxyphenylacetic acid                                 | 44.5 $\pm$ 5.3      | 117 $\pm$ 29      | 57.8 $\pm$ 10.5   | 63.5 $\pm$ 12.2   | 460 $\pm$ 71      |
| 3-(4-hydroxy-3'-methoxyphenyl)propanoic acid-4'-sulfate     | 0.50 $\pm$ 0.13     | 0.44 $\pm$ 0.09   | 0.10 $\pm$ 0.04   | 0.59 $\pm$ 0.42   | 3.91 $\pm$ 0.76   |
| 3-Phenylpropanoic acid-3'-sulfate                           | 0.39 $\pm$ 0.15     | 0.60 $\pm$ 0.28   | 0.17 $\pm$ 0.06   | 0.32 $\pm$ 0.20   | 2.13 $\pm$ 0.45   |
| 3-Phenylpropanoic acid-4'-glucuronide                       | 0.039 $\pm$ 0.013   | 0.060 $\pm$ 0.021 | 0.035 $\pm$ 0.006 | 0.046 $\pm$ 0.015 | 0.32 $\pm$ 0.11   |
| 3-(4-hydroxy 3'-methoxyphenyl)propanoic acid-4'-glucuronide | 0.11 $\pm$ 0.03     | 0.11 $\pm$ 0.02   | 0.07 $\pm$ 0.01   | 0.12 $\pm$ 0.05   | 0.85 $\pm$ 0.12   |
| 3-Methoxy-4-hydroxybenzoic acid                             | 0.43 $\pm$ 0.23     | 0.95 $\pm$ 0.47   | 0.30 $\pm$ 0.07   | 0.48 $\pm$ 0.10   | 5.83 $\pm$ 2.77   |
| 3-(3-hydroxy4'-methoxyphenyl)propanoic acid-3'-sulfate      | 0.016 $\pm$ 0.008   | 0.021 $\pm$ 0.012 | 0.006 $\pm$ 0.004 | 0.27 $\pm$ 0.13   | 3.75 $\pm$ 0.86   |
| 3'-Hydroxyphenylacetic acid                                 | 23.0 $\pm$ 4.5      | 58.8 $\pm$ 12.2   | 34.9 $\pm$ 6.3    | 32.2 $\pm$ 6.5    | 171 $\pm$ 32      |
| 4'-Hydroxy-3'-methoxyphenylacetic acid                      | 5.19 $\pm$ 0.60     | 12.5 $\pm$ 1.6    | 6.86 $\pm$ 0.74   | 7.02 $\pm$ 1.03   | 40.5 $\pm$ 5.0    |
| 3-(3-hydroxy 4'-methoxyphenyl)propanoic-3'-glucuronide      | 0.002 $\pm$ 0.001   | 0.004 $\pm$ 0.002 | 0.003 $\pm$ 0.001 | 0.053 $\pm$ 0.022 | 0.62 $\pm$ 0.18   |
| 3-(4'-hydroxyphenyl)propanoic acid                          | 0.005 $\pm$ 0.002   | 0.024 $\pm$ 0.009 | 0.014 $\pm$ 0.005 | 0.016 $\pm$ 0.004 | 0.089 $\pm$ 0.027 |
| 4'-Hydroxycinnamic acid                                     | 0.013 $\pm$ 0.008   | 0.017 $\pm$ 0.016 | 0.004 $\pm$ 0.002 | 0.057 $\pm$ 0.019 | 0.28 $\pm$ 0.16   |
| 3-(3'-hydroxyphenyl)propanoic acid                          | 0.056 $\pm$ 0.011   | 0.11 $\pm$ 0.01   | 0.065 $\pm$ 0.010 | 0.17 $\pm$ 0.04   | 0.64 $\pm$ 0.09   |
| 3-(3'-methoxy-4'-hydroxyphenyl)propanoic acid               | 0.11 $\pm$ 0.05     | 0.16 $\pm$ 0.05   | 0.11 $\pm$ 0.03   | 0.32 $\pm$ 0.12   | 1.50 $\pm$ 0.49   |
| 3-(3'-hydroxy-4'-methoxyphenyl)propanoic acid               | 0.022 $\pm$ 0.003   | 0.049 $\pm$ 0.006 | 0.028 $\pm$ 0.003 | 0.049 $\pm$ 0.011 | 0.36 $\pm$ 0.06   |
| 3',4'-dimethoxyphenylacetic acid                            | 44.1 $\pm$ 13.6     | 48 $\pm$ 8        | 22.8 $\pm$ 2.0    | 30.3 $\pm$ 4.5    | 194 $\pm$ 21      |
| 4'-Methoxycinnamic acid-3'-glucuronide                      | 0.054 $\pm$ 0.018   | 0.15 $\pm$ 0.08   | 0.06 $\pm$ 0.01   | 0.16 $\pm$ 0.06   | 1.78 $\pm$ 0.33   |
| 3-Hydroxy-3-(3'-hydroxy-4'-methoxyphenyl)propanoic acid     | 0.43 $\pm$ 0.14     | 0.48 $\pm$ 0.20   | 0.69 $\pm$ 0.26   | 7.93 $\pm$ 2.97   | 66.6 $\pm$ 12.8   |

Data expressed as mean  $\pm$  standard deviation.

**Table S3.** Quantities of Hesperidin metabolites and Hesperidin catabolites in urine before and after Micronised Hesperidin epimeric mixture (MHM) ingestion.

| Variable                                                    | 0 h               | 0-3 h               | 3-6 h             | 6-8 h             | 8-24 h            |
|-------------------------------------------------------------|-------------------|---------------------|-------------------|-------------------|-------------------|
| <i>Metabolites, <math>\mu\text{mol}</math></i>              |                   |                     |                   |                   |                   |
| Hesperetin 7,3'-di-O-glucuronide                            | 0 $\pm$ 0         | 0.001 $\pm$ 0.001   | 0.041 $\pm$ 0.019 | 0.82 $\pm$ 0.23   | 4.66 $\pm$ 0.78   |
| Naringenin 7-O-glucuronide                                  | 0.005 $\pm$ 0.002 | 0.009 $\pm$ 0.003   | 0.017 $\pm$ 0.006 | 0.11 $\pm$ 0.04   | 0.28 $\pm$ 0.06   |
| Naringenin 4-O-glucuronide                                  | 0.007 $\pm$ 0.003 | 0.014 $\pm$ 0.006   | 0.016 $\pm$ 0.006 | 0.16 $\pm$ 0.03   | 0.49 $\pm$ 0.12   |
| Hesperetin 7-O-glucuronide                                  | 0.004 $\pm$ 0.002 | 0.004 $\pm$ 0.002   | 0.075 $\pm$ 0.033 | 1.62 $\pm$ 0.47   | 4.24 $\pm$ 0.68   |
| Hesperetin 3-O-glucuronide                                  | 0.019 $\pm$ 0.002 | 0.095 $\pm$ 0.013   | 0.49 $\pm$ 0.16   | 13.6 $\pm$ 4.2    | 37.7 $\pm$ 8.0    |
| Hesperetin 7-O-sulfate                                      | 0.001 $\pm$ 0.000 | 0.010 $\pm$ 0.001   | 0.044 $\pm$ 0.015 | 0.95 $\pm$ 0.31   | 2.45 $\pm$ 0.53   |
| Hesperetin                                                  | 0 $\pm$ 0         | 0.001 $\pm$ 0.000   | 0.002 $\pm$ 0.000 | 0.014 $\pm$ 0.004 | 0.12 $\pm$ 0.02   |
| <i>Catabolites, <math>\mu\text{mol}</math></i>              |                   |                     |                   |                   |                   |
| 2-Hydroxy-2-(4' -hydroxyphenyl)acetic acid                  | 1.53 $\pm$ 0.15   | 3.28 $\pm$ 0.38     | 3.62 $\pm$ 0.48   | 3.02 $\pm$ 0.30   | 17.7 $\pm$ 3.2    |
| 2-Hydroxy-2-(4' -hydroxy-3' -methoxyphenyl)acetic acid      | 1.11 $\pm$ 0.09   | 2.49 $\pm$ 0.26     | 2.13 $\pm$ 0.30   | 2.41 $\pm$ 0.34   | 9.86 $\pm$ 0.60   |
| 4'-Hydroxyhippuric acid                                     | 2.05 $\pm$ 0.35   | 3.68 $\pm$ 0.52     | 3.14 $\pm$ 0.49   | 4.43 $\pm$ 0.52   | 18.1 $\pm$ 1.9    |
| 3'-Hydroxyhippuric acid                                     | 5.62 $\pm$ 2.74   | 9.62 $\pm$ 5.83     | 7.79 $\pm$ 5.82   | 6.04 $\pm$ 2.85   | 36.0 $\pm$ 10.6   |
| 33-Hydroxy-3-(3' -hydroxyphenyl)propanoic acid              | 24.5 $\pm$ 14.9   | 39 $\pm$ 27         | 33.8 $\pm$ 26.6   | 24.6 $\pm$ 14.0   | 131 $\pm$ 47      |
| 3-(3'-hydroxyphenyl)propanoic acid-4'-sulfate               | 0.21 $\pm$ 0.02   | 0.34 $\pm$ 0.06     | 0.19 $\pm$ 0.04   | 0.25 $\pm$ 0.06   | 1.46 $\pm$ 0.18   |
| 3-(3'-hydroxyphenyl)propanoic acid-4'-glucuronide           | 0.024 $\pm$ 0.002 | 0.072 $\pm$ 0.007   | 0.073 $\pm$ 0.004 | 0.066 $\pm$ 0.012 | 0.25 $\pm$ 0.02   |
| 3-(4'-hydroxyphenyl)propanoic acid-3'-sulfate               | 0.27 $\pm$ 0.09   | 0.26 $\pm$ 0.08     | 0.14 $\pm$ 0.02   | 0.14 $\pm$ 0.04   | 1.21 $\pm$ 0.31   |
| Hippuric acid                                               | 26.9 $\pm$ 4.2    | 66.4 $\pm$ 11.8     | 67.0 $\pm$ 10.4   | 48.6 $\pm$ 6.2    | 215 $\pm$ 16      |
| 3-(4'-hydroxyphenyl)propanoic acid-3-glucuronide            | 0.13 $\pm$ 0.02   | 0.30 $\pm$ 0.04     | 0.22 $\pm$ 0.03   | 0.21 $\pm$ 0.03   | 0.97 $\pm$ 0.06   |
| 4'-Hydroxyphenylacetic acid                                 | 51.5 $\pm$ 6.6    | 74.5 $\pm$ 17.9     | 64.3 $\pm$ 8.4    | 77.1 $\pm$ 11.8   | 439 $\pm$ 91      |
| 3-(4-hydroxy-3'-methoxyphenyl)propanoic acid-4'-sulfate     | 0.28 $\pm$ 0.07   | 0.46 $\pm$ 0.13     | 0.11 $\pm$ 0.05   | 0.37 $\pm$ 0.09   | 2.60 $\pm$ 0.52   |
| 3-Phenylpropanoic acid-3'-sulfate                           | 0.45 $\pm$ 0.25   | 0.60 $\pm$ 0.34     | 0.60 $\pm$ 0.46   | 0.49 $\pm$ 0.25   | 2.57 $\pm$ 0.85   |
| 3-Phenylpropanoic acid-4'-glucuronide                       | 0.065 $\pm$ 0.032 | 0.10 $\pm$ 0.04     | 0.087 $\pm$ 0.041 | 0.059 $\pm$ 0.022 | 0.40 $\pm$ 0.16   |
| 3-(4-hydroxy 3'-methoxyphenyl)propanoic acid-4'-glucuronide | 0.060 $\pm$ 0.014 | 0.13 $\pm$ 0.03     | 0.10 $\pm$ 0.02   | 0.11 $\pm$ 0.02   | 0.62 $\pm$ 0.11   |
| 3-Methoxy-4-hydroxybenzoic acid                             | 0.38 $\pm$ 0.15   | 0.42 $\pm$ 0.09     | 0.33 $\pm$ 0.06   | 0.67 $\pm$ 0.17   | 5.98 $\pm$ 3.96   |
| 3-(3-hydroxy4'-methoxyphenyl)propanoic acid-3'-sulfate      | 0.004 $\pm$ 0.002 | 0.0003 $\pm$ 0.0001 | 0.001 $\pm$ 0.000 | 0.47 $\pm$ 0.18   | 4.31 $\pm$ 0.87   |
| 3'-Hydroxyphenylacetic acid                                 | 22.7 $\pm$ 3.9    | 39.2 $\pm$ 7.1      | 40.1 $\pm$ 7.6    | 35.9 $\pm$ 7.3    | 159 $\pm$ 21      |
| 4' -Hydroxy-3' -methoxyphenylacetic acid                    | 5.09 $\pm$ 0.48   | 9.66 $\pm$ 0.96     | 8.38 $\pm$ 0.96   | 7.98 $\pm$ 1.11   | 37.5 $\pm$ 2.6    |
| 3-(3-hydroxy 4'-methoxyphenyl)propanoic-3'-glucuronide      | 0.001 $\pm$ 0.000 | 0.001 $\pm$ 0.000   | 0.003 $\pm$ 0.001 | 0.09 $\pm$ 0.03   | 0.68 $\pm$ 0.15   |
| 3-(4'-hydroxyphenyl)propanoic acid                          | 0.005 $\pm$ 0.001 | 0.016 $\pm$ 0.006   | 0.018 $\pm$ 0.009 | 0.008 $\pm$ 0.003 | 0.053 $\pm$ 0.025 |
| 4'-Hydroxycinnamic acid                                     | 0.010 $\pm$ 0.004 | 0.003 $\pm$ 0.002   | 0.004 $\pm$ 0.001 | 0.055 $\pm$ 0.024 | 0.084 $\pm$ 0.036 |
| 3-(3'-hydroxyphenyl)propanoic acid                          | 0.15 $\pm$ 0.08   | 0.12 $\pm$ 0.04     | 0.12 $\pm$ 0.03   | 0.20 $\pm$ 0.03   | 0.76 $\pm$ 0.13   |
| 3-(3'-methoxy-4'-hydroxyphenyl)propanoic acid               | 0.076 $\pm$ 0.025 | 0.18 $\pm$ 0.05     | 0.15 $\pm$ 0.04   | 0.3 $\pm$ 0.1     | 0.92 $\pm$ 0.21   |
| 3-(3'-hydroxy-4'-methoxyphenyl)propanoic acid               | 0.026 $\pm$ 0.003 | 0.037 $\pm$ 0.004   | 0.035 $\pm$ 0.005 | 0.085 $\pm$ 0.035 | 0.37 $\pm$ 0.05   |
| 3',4'-dimethoxyphenylacetic acid                            | 23.3 $\pm$ 4.0    | 29.6 $\pm$ 3.0      | 29.4 $\pm$ 3.2    | 32.3 $\pm$ 3.7    | 183 $\pm$ 17      |
| 4' -Methoxycinnamic acid-3' -glucuronide                    | 0.030 $\pm$ 0.006 | 0.052 $\pm$ 0.009   | 0.058 $\pm$ 0.007 | 0.29 $\pm$ 0.09   | 2.05 $\pm$ 0.30   |
| 3-Hydroxy-3-(3' -hydroxy-4' -methoxyphenyl)propanoic acid   | 0.18 $\pm$ 0.05   | 0.23 $\pm$ 0.05     | 0.53 $\pm$ 0.13   | 13.1 $\pm$ 3.8    | 87.5 $\pm$ 15.5   |

Data expressed as mean  $\pm$  standard deviation.

**Table S4.** Quantities of Hesperidin metabolites and catabolites in urine before and after Micronised 2S-Hesperidin (M2SH) ingestion.

| Variable                                                    | 0 h                 | 0-3 h             | 3-6 h             | 6-8 h             | 8-24 h            |
|-------------------------------------------------------------|---------------------|-------------------|-------------------|-------------------|-------------------|
| <i>Metabolites, <math>\mu\text{mol}</math></i>              |                     |                   |                   |                   |                   |
| Hesperetin 7,3'-di-O-glucuronide                            | 0.004 $\pm$ 0.004   | 0.004 $\pm$ 0.003 | 0.069 $\pm$ 0.027 | 0.36 $\pm$ 0.09   | 1.77 $\pm$ 0.39   |
| Naringenin 7-O-glucuronide                                  | 0.014 $\pm$ 0.003   | 0.025 $\pm$ 0.010 | 0.030 $\pm$ 0.009 | 0.077 $\pm$ 0.016 | 0.23 $\pm$ 0.06   |
| Naringenin 4-O-glucuronide                                  | 0.024 $\pm$ 0.007   | 0.044 $\pm$ 0.019 | 0.063 $\pm$ 0.018 | 0.20 $\pm$ 0.04   | 0.38 $\pm$ 0.09   |
| Hesperetin 7-O-glucuronide                                  | 0.006 $\pm$ 0.004   | 0.006 $\pm$ 0.003 | 0.14 $\pm$ 0.06   | 0.65 $\pm$ 0.15   | 1.55 $\pm$ 0.42   |
| Hesperetin 3-O-glucuronide                                  | 0.062 $\pm$ 0.041   | 0.11 $\pm$ 0.02   | 0.74 $\pm$ 0.23   | 3.71 $\pm$ 1.02   | 15.0 $\pm$ 4.8    |
| Hesperetin 7-O-sulfate                                      | 0.005 $\pm$ 0.004   | 0.010 $\pm$ 0.002 | 0.076 $\pm$ 0.028 | 0.36 $\pm$ 0.12   | 1.51 $\pm$ 0.53   |
| Hesperetin                                                  | 0.0002 $\pm$ 0.0001 | 0.001 $\pm$ 0.000 | 0.002 $\pm$ 0.000 | 0.009 $\pm$ 0.002 | 0.054 $\pm$ 0.013 |
| <i>Catabolites, <math>\mu\text{mol}</math></i>              |                     |                   |                   |                   |                   |
| 2-Hydroxy-2-(4'-hydroxyphenyl)acetic acid                   | 1.56 $\pm$ 0.20     | 3.72 $\pm$ 0.43   | 3.27 $\pm$ 0.45   | 3.45 $\pm$ 0.42   | 15.0 $\pm$ 1.4    |
| 2-Hydroxy-2-(4'-hydroxy-3'-methoxyphenyl)acetic acid        | 1.21 $\pm$ 0.12     | 2.64 $\pm$ 0.29   | 2.20 $\pm$ 0.32   | 2.50 $\pm$ 0.35   | 10.3 $\pm$ 1.0    |
| 4'-Hydroxyhippuric acid                                     | 2.49 $\pm$ 0.85     | 4.14 $\pm$ 0.63   | 3.15 $\pm$ 0.56   | 4.90 $\pm$ 0.71   | 17.6 $\pm$ 1.4    |
| 3'-Hydroxyhippuric acid                                     | 5.61 $\pm$ 3.25     | 10.2 $\pm$ 4.8    | 8.32 $\pm$ 5.42   | 10.6 $\pm$ 6.2    | 43.7 $\pm$ 8.9    |
| 33-Hydroxy-3-(3'-hydroxyphenyl)propanoic acid               | 24.3 $\pm$ 16.4     | 34.8 $\pm$ 18.6   | 29.6 $\pm$ 19.6   | 40.0 $\pm$ 25.3   | 157 $\pm$ 40      |
| 3-(3'-hydroxyphenyl)propanoic acid-4'-sulfate               | 0.27 $\pm$ 0.04     | 0.43 $\pm$ 0.09   | 0.23 $\pm$ 0.05   | 0.29 $\pm$ 0.07   | 2.82 $\pm$ 1.37   |
| 3-(3'-hydroxyphenyl)propanoic acid-4'-glucuronide           | 0.036 $\pm$ 0.008   | 0.082 $\pm$ 0.009 | 0.072 $\pm$ 0.009 | 0.077 $\pm$ 0.012 | 1.95 $\pm$ 1.26   |
| 3-(4'-hydroxyphenyl)propanoic acid-3'-sulfate               | 0.35 $\pm$ 0.14     | 0.55 $\pm$ 0.26   | 0.22 $\pm$ 0.06   | 0.32 $\pm$ 0.15   | 3.50 $\pm$ 2.13   |
| Hippuric acid                                               | 24.5 $\pm$ 4.0      | 65.2 $\pm$ 8.2    | 52 $\pm$ 6        | 61.7 $\pm$ 9.2    | 218 $\pm$ 11      |
| 3-(4'-hydroxyphenyl)propanoic acid-3-glucuronide            | 0.14 $\pm$ 0.01     | 0.31 $\pm$ 0.05   | 0.19 $\pm$ 0.02   | 0.26 $\pm$ 0.05   | 2.57 $\pm$ 1.05   |
| 4'-Hydroxyphenylacetic acid                                 | 44.1 $\pm$ 8.3      | 77.0 $\pm$ 17.4   | 53.0 $\pm$ 9.3    | 76.1 $\pm$ 17.6   | 385 $\pm$ 61      |
| 3-(4-hydroxy-3'-methoxyphenyl)propanoic acid-4'-sulfate     | 0.33 $\pm$ 0.08     | 0.63 $\pm$ 0.22   | 0.28 $\pm$ 0.10   | 0.36 $\pm$ 0.09   | 4.67 $\pm$ 1.53   |
| 3-Phenylpropanoic acid-3'-sulfate                           | 0.56 $\pm$ 0.35     | 0.79 $\pm$ 0.32   | 0.56 $\pm$ 0.34   | 1.07 $\pm$ 0.70   | 3.33 $\pm$ 0.74   |
| 3-Phenylpropanoic acid-4'-glucuronide                       | 0.054 $\pm$ 0.038   | 0.070 $\pm$ 0.024 | 0.080 $\pm$ 0.036 | 0.12 $\pm$ 0.07   | 0.48 $\pm$ 0.20   |
| 3-(4-hydroxy 3'-methoxyphenyl)propanoic acid-4'-glucuronide | 0.066 $\pm$ 0.011   | 0.14 $\pm$ 0.03   | 0.11 $\pm$ 0.02   | 0.11 $\pm$ 0.02   | 1.19 $\pm$ 0.47   |
| 3-Methoxy-4-hydroxybenzoic acid                             | 0.23 $\pm$ 0.12     | 0.58 $\pm$ 0.17   | 0.36 $\pm$ 0.08   | 0.68 $\pm$ 0.22   | 13.5 $\pm$ 6.1    |
| 3-(3-hydroxy4'-methoxyphenyl)propanoic acid-3'-sulfate      | 0.14 $\pm$ 0.14     | 0.05 $\pm$ 0.04   | 0.13 $\pm$ 0.05   | 1.17 $\pm$ 0.44   | 10.7 $\pm$ 2.1    |
| 3'-Hydroxyphenylacetic acid                                 | 24.1 $\pm$ 3.4      | 46.9 $\pm$ 7.4    | 39.8 $\pm$ 5.3    | 36.4 $\pm$ 5.3    | 182 $\pm$ 29      |
| 4'-Hydroxy-3'-methoxyphenylacetic acid                      | 6.22 $\pm$ 0.68     | 12.1 $\pm$ 1.3    | 9.16 $\pm$ 0.93   | 9.10 $\pm$ 0.94   | 56.1 $\pm$ 16.6   |
| 3-(3-hydroxy 4'-methoxyphenyl)propanoic acid-3'-glucuronide | 0.012 $\pm$ 0.010   | 0.006 $\pm$ 0.003 | 0.024 $\pm$ 0.009 | 0.18 $\pm$ 0.06   | 1.51 $\pm$ 0.32   |
| 3-(4'-hydroxyphenyl)propanoic acid                          | 0.022 $\pm$ 0.016   | 0.025 $\pm$ 0.011 | 0.029 $\pm$ 0.011 | 0.016 $\pm$ 0.005 | 0.069 $\pm$ 0.025 |
| 4'-Hydroxycinnamic acid                                     | 0.018 $\pm$ 0.011   | 0.012 $\pm$ 0.006 | 0.006 $\pm$ 0.003 | 0.043 $\pm$ 0.011 | 0.10 $\pm$ 0.03   |
| 3-(3'-hydroxyphenyl)propanoic acid                          | 0.065 $\pm$ 0.016   | 0.12 $\pm$ 0.02   | 0.095 $\pm$ 0.016 | 0.20 $\pm$ 0.02   | 0.76 $\pm$ 0.15   |
| 3-(3'-methoxy-4'-hydroxyphenyl)propanoic acid               | 0.078 $\pm$ 0.046   | 0.21 $\pm$ 0.06   | 0.31 $\pm$ 0.15   | 0.27 $\pm$ 0.07   | 1.09 $\pm$ 0.22   |
| 3-(3'-hydroxy-4'-methoxyphenyl)propanoic acid               | 0.025 $\pm$ 0.004   | 0.041 $\pm$ 0.006 | 0.031 $\pm$ 0.006 | 0.091 $\pm$ 0.034 | 0.55 $\pm$ 0.08   |
| 3',4'-dimethoxyphenylacetic acid                            | 23.5 $\pm$ 4.6      | 32.9 $\pm$ 3.1    | 25.0 $\pm$ 3.2    | 32.9 $\pm$ 2.9    | 182 $\pm$ 18      |
| 4'-Methoxycinnamic acid-3'-glucuronide                      | 0.093 $\pm$ 0.063   | 0.12 $\pm$ 0.04   | 0.13 $\pm$ 0.03   | 0.50 $\pm$ 0.17   | 4.01 $\pm$ 0.73   |
| 3-Hydroxy-3-(3'-hydroxy-4'-methoxyphenyl)propanoic acid     | 1.57 $\pm$ 1.31     | 1.16 $\pm$ 0.59   | 3.63 $\pm$ 1.73   | 23.8 $\pm$ 7.7    | 155 $\pm$ 23      |

Data expressed as mean  $\pm$  standard deviation.

**Table S5.** Concentration of Hesperidin metabolites and catabolites in serum before and after Hesperidin epimeric mixture (HEM) ingestion.

| Variable                                                       | 0 h                 | 2 h                 | 3 h                 | 4 h                 | 5 h                 | 6 h               | 7 h                 | 8 h               | 24 h                |
|----------------------------------------------------------------|---------------------|---------------------|---------------------|---------------------|---------------------|-------------------|---------------------|-------------------|---------------------|
| <i>Metabolites, <math>\mu\text{M}</math></i>                   |                     |                     |                     |                     |                     |                   |                     |                   |                     |
| Hesperetin, 7,3,di-O-Glucuronide                               | 0.001 $\pm$ 0.000   | 0.001 $\pm$ 0.000   | 0.001 $\pm$ 0.000   | 0.002 $\pm$ 0.004   | 0.004 $\pm$ 0.009   | 0.014 $\pm$ 0.017 | 0.029 $\pm$ 0.025   | 0.040 $\pm$ 0.029 | 0.013 $\pm$ 0.021   |
| Hesperetin 7-O-Glucuronide                                     | 0.0003 $\pm$ 0.0000 | 0.0003 $\pm$ 0.0000 | 0.0003 $\pm$ 0.0000 | 0.003 $\pm$ 0.007   | 0.018 $\pm$ 0.024   | 0.054 $\pm$ 0.059 | 0.083 $\pm$ 0.070   | 0.084 $\pm$ 0.052 | 0.028 $\pm$ 0.055   |
| Hesperetin 3-O-Glucuronide                                     | 0.001 $\pm$ 0.000   | 0.001 $\pm$ 0.000   | 0.003 $\pm$ 0.008   | 0.012 $\pm$ 0.017   | 0.030 $\pm$ 0.039   | 0.085 $\pm$ 0.096 | 0.13 $\pm$ 0.12     | 0.15 $\pm$ 0.12   | 0.057 $\pm$ 0.086   |
| Hesperetin 7-O-Sulfate                                         | 0.0001 $\pm$ 0.0003 | 0.0003 $\pm$ 0.0005 | 0.001 $\pm$ 0.002   | 0.004 $\pm$ 0.007   | 0.012 $\pm$ 0.016   | 0.085 $\pm$ 0.084 | 0.086 $\pm$ 0.065   | 0.086 $\pm$ 0.049 | 0.026 $\pm$ 0.042   |
| Hesperetin                                                     | 0.0003 $\pm$ 0.0008 | 0.0001 $\pm$ 0.0000 | 0.0001 $\pm$ 0.0000 | 0.0001 $\pm$ 0.0000 | 0.0001 $\pm$ 0.0000 | 0.001 $\pm$ 0.001 | 0.0004 $\pm$ 0.0010 | 0.001 $\pm$ 0.001 | 0.0001 $\pm$ 0.0001 |
| <i>Catabolites, <math>\mu\text{M}</math></i>                   |                     |                     |                     |                     |                     |                   |                     |                   |                     |
| 2-Hydroxy-2-(4' -hydroxy-3' -methoxyphenyl)acetic acid         | 0.028 $\pm$ 0.007   | 0.024 $\pm$ 0.008   | 0.024 $\pm$ 0.007   | 0.024 $\pm$ 0.008   | 0.025 $\pm$ 0.007   | 0.028 $\pm$ 0.008 | 0.025 $\pm$ 0.005   | 0.024 $\pm$ 0.008 | 0.029 $\pm$ 0.008   |
| 4'-Hydroxyhippuric acid                                        | 0.022 $\pm$ 0.008   | 0.016 $\pm$ 0.008   | 0.014 $\pm$ 0.007   | 0.014 $\pm$ 0.007   | 0.014 $\pm$ 0.007   | 0.028 $\pm$ 0.009 | 0.026 $\pm$ 0.007   | 0.022 $\pm$ 0.006 | 0.034 $\pm$ 0.023   |
| 3'-Hydroxyhippuric acid                                        | 0.065 $\pm$ 0.090   | 0.040 $\pm$ 0.058   | 0.030 $\pm$ 0.037   | 0.024 $\pm$ 0.028   | 0.017 $\pm$ 0.017   | 0.019 $\pm$ 0.014 | 0.028 $\pm$ 0.017   | 0.032 $\pm$ 0.021 | 0.11 $\pm$ 0.07     |
| 3-Hydroxy-3-(3' -hydroxyphenyl)propanoic acid                  | 0.11 $\pm$ 0.24     | 0.035 $\pm$ 0.088   | 0.029 $\pm$ 0.065   | 0.021 $\pm$ 0.058   | 0.017 $\pm$ 0.042   | 0.026 $\pm$ 0.053 | 0.028 $\pm$ 0.048   | 0.045 $\pm$ 0.063 | 0.27 $\pm$ 0.24     |
| Hippuric acid                                                  | 1.18 $\pm$ 0.82     | 0.69 $\pm$ 0.49     | 0.59 $\pm$ 0.42     | 0.57 $\pm$ 0.39     | 0.56 $\pm$ 0.37     | 0.63 $\pm$ 0.29   | 0.58 $\pm$ 0.28     | 0.53 $\pm$ 0.25   | 1.44 $\pm$ 0.69     |
| 4'-Hydroxyphenylacetic acid                                    | 4.40 $\pm$ 5.29     | 3.83 $\pm$ 3.59     | 3.35 $\pm$ 2.75     | 3.04 $\pm$ 2.59     | 2.64 $\pm$ 1.52     | 3.54 $\pm$ 2.08   | 3.51 $\pm$ 2.11     | 3.30 $\pm$ 1.97   | 4.78 $\pm$ 4.03     |
| 3-(4'-hydroxy-3'-methoxyphenyl)propanoic acid - 4'-sulfate     | 0.006 $\pm$ 0.005   | 0.003 $\pm$ 0.002   | 0.002 $\pm$ 0.002   | 0.002 $\pm$ 0.001   | 0.002 $\pm$ 0.002   | 0.004 $\pm$ 0.004 | 0.005 $\pm$ 0.004   | 0.005 $\pm$ 0.003 | 0.019 $\pm$ 0.035   |
| 3-(4'-hydroxy-3'-methoxyphenyl)propanoic acid - 4'-glucuronide | 0.003 $\pm$ 0.002   | 0.002 $\pm$ 0.001   | 0.002 $\pm$ 0.001   | 0.001 $\pm$ 0.001   | 0.001 $\pm$ 0.001   | 0.002 $\pm$ 0.002 | 0.003 $\pm$ 0.002   | 0.003 $\pm$ 0.002 | 0.008 $\pm$ 0.009   |
| 3-(4'-hydroxy-3'-methoxyphenyl)propanoic acid - 3'-sulfate     | 0.001 $\pm$ 0.001   | 0.0004 $\pm$ 0.0012 | 0.0004 $\pm$ 0.0012 | 0.001 $\pm$ 0.001   | 0.002 $\pm$ 0.003   | 0.006 $\pm$ 0.008 | 0.016 $\pm$ 0.018   | 0.022 $\pm$ 0.020 | 0.024 $\pm$ 0.026   |
| 3'-hydroxyphenylacetic acid                                    | 3.67 $\pm$ 1.91     | 3.37 $\pm$ 1.74     | 3.19 $\pm$ 1.75     | 2.92 $\pm$ 1.57     | 2.57 $\pm$ 1.43     | 3.04 $\pm$ 1.50   | 2.95 $\pm$ 1.38     | 2.91 $\pm$ 1.07   | 3.1 $\pm$ 1.3       |
| 4' -Hydroxy-3' -methoxyphenylacetic acid                       | 0.23 $\pm$ 0.09     | 0.17 $\pm$ 0.09     | 0.15 $\pm$ 0.08     | 0.15 $\pm$ 0.07     | 0.15 $\pm$ 0.08     | 0.16 $\pm$ 0.05   | 0.15 $\pm$ 0.08     | 0.13 $\pm$ 0.07   | 0.22 $\pm$ 0.07     |
| 3-(3'-hydroxy-4'-methoxyphenyl)propanoic acid - 3'-glucuronide | 0.0002 $\pm$ 0.0002 | 0.0001 $\pm$ 0.0002 | 0.0001 $\pm$ 0.0001 | 0.0001 $\pm$ 0.0001 | 0.0002 $\pm$ 0.0002 | 0.001 $\pm$ 0.001 | 0.001 $\pm$ 0.002   | 0.002 $\pm$ 0.002 | 0.002 $\pm$ 0.002   |
| 3-(3'-hydroxyphenyl)propanoic acid                             | 0.42 $\pm$ 0.10     | 0.42 $\pm$ 0.09     | 0.40 $\pm$ 0.08     | 0.37 $\pm$ 0.08     | 0.36 $\pm$ 0.09     | 0.45 $\pm$ 0.08   | 0.48 $\pm$ 0.09     | 0.46 $\pm$ 0.09   | 0.41 $\pm$ 0.14     |
| 3-(4'-hydroxy-3'-methoxyphenyl)propanoic acid                  | 0.026 $\pm$ 0.019   | 0.015 $\pm$ 0.010   | 0.010 $\pm$ 0.006   | 0.009 $\pm$ 0.007   | 0.011 $\pm$ 0.010   | 0.028 $\pm$ 0.027 | 0.034 $\pm$ 0.028   | 0.03 $\pm$ 0.02   | 0.086 $\pm$ 0.141   |
| 3-(3'-hydroxyphenyl-4'-methoxyphenyl)propionic acid            | 0.010 $\pm$ 0.021   | 0.007 $\pm$ 0.015   | 0.007 $\pm$ 0.016   | 0.016 $\pm$ 0.024   | 0.041 $\pm$ 0.059   | 0.18 $\pm$ 0.23   | 0.31 $\pm$ 0.33     | 0.35 $\pm$ 0.31   | 0.2 $\pm$ 0.2       |
| 3 Phenylpropanoic acid                                         | 0.49 $\pm$ 0.29     | 0.50 $\pm$ 0.37     | 0.45 $\pm$ 0.31     | 0.38 $\pm$ 0.27     | 0.34 $\pm$ 0.24     | 0.50 $\pm$ 0.38   | 0.50 $\pm$ 0.39     | 0.47 $\pm$ 0.35   | 0.73 $\pm$ 0.47     |
| 4' -Methoxycinnamic acid-3' -glucuronide                       | 0.001 $\pm$ 0.001   | 0.001 $\pm$ 0.001   | 0.001 $\pm$ 0.001   | 0.0004 $\pm$ 0.0005 | 0.0004 $\pm$ 0.0005 | 0.001 $\pm$ 0.001 | 0.002 $\pm$ 0.002   | 0.003 $\pm$ 0.003 | 0.007 $\pm$ 0.008   |

Data expressed as mean  $\pm$  standard deviation.

**Table S6.** Concentration of Hesperidin metabolites and catabolites in serum before and after Micronised Hesperidin epimeric mixture (MHEM) ingestion.

| Variable                                                       | 0 h                 | 2 h                 | 3 h                 | 4 h                 | 5 h                 | 6 h               | 7 h               | 8 h               | 24 h              |
|----------------------------------------------------------------|---------------------|---------------------|---------------------|---------------------|---------------------|-------------------|-------------------|-------------------|-------------------|
| <i>Metabolites, <math>\mu\text{M}</math></i>                   |                     |                     |                     |                     |                     |                   |                   |                   |                   |
| Hesperetin, 7,3,di-O-Glucuronide                               | 0.001 $\pm$ 0.000   | 0.001 $\pm$ 0.000   | 0.001 $\pm$ 0.000   | 0.001 $\pm$ 0.002   | 0.001 $\pm$ 0.004   | 0.018 $\pm$ 0.021 | 0.061 $\pm$ 0.060 | 0.061 $\pm$ 0.056 | 0.026 $\pm$ 0.038 |
| Hesperetin 7-O-Glucuronide                                     | 0.0005 $\pm$ 0.0009 | 0.001 $\pm$ 0.002   | 0.001 $\pm$ 0.003   | 0.003 $\pm$ 0.005   | 0.021 $\pm$ 0.027   | 0.092 $\pm$ 0.091 | 0.17 $\pm$ 0.16   | 0.14 $\pm$ 0.13   | 0.046 $\pm$ 0.075 |
| Hesperetin 3-O-Glucuronide                                     | 0.001 $\pm$ 0.000   | 0.001 $\pm$ 0.000   | 0.001 $\pm$ 0.000   | 0.008 $\pm$ 0.016   | 0.037 $\pm$ 0.041   | 0.11 $\pm$ 0.08   | 0.27 $\pm$ 0.27   | 0.22 $\pm$ 0.20   | 0.071 $\pm$ 0.094 |
| Hesperetin 7-O-Sulfate                                         | 0.0001 $\pm$ 0.0002 | 0.001 $\pm$ 0.000   | 0.001 $\pm$ 0.001   | 0.005 $\pm$ 0.008   | 0.022 $\pm$ 0.036   | 0.16 $\pm$ 0.20   | 0.28 $\pm$ 0.31   | 0.21 $\pm$ 0.20   | 0.054 $\pm$ 0.078 |
| Hesperetin                                                     | 0.0001 $\pm$ 0.0000 | 0.0001 $\pm$ 0.0000 | 0.0001 $\pm$ 0.0000 | 0.0001 $\pm$ 0.0000 | 0.0002 $\pm$ 0.0006 | 0.002 $\pm$ 0.003 | 0.003 $\pm$ 0.005 | 0.002 $\pm$ 0.003 | 0.001 $\pm$ 0.001 |
| <i>Catabolites, <math>\mu\text{M}</math></i>                   |                     |                     |                     |                     |                     |                   |                   |                   |                   |
| 2-Hydroxy-2-(4' -hydroxy-3' -methoxyphenyl)acetic acid         | 0.029 $\pm$ 0.007   | 0.027 $\pm$ 0.007   | 0.024 $\pm$ 0.007   | 0.023 $\pm$ 0.009   | 0.025 $\pm$ 0.007   | 0.028 $\pm$ 0.008 | 0.023 $\pm$ 0.010 | 0.024 $\pm$ 0.005 | 0.029 $\pm$ 0.006 |
| 4'-Hydroxyhippuric acid                                        | 0.026 $\pm$ 0.010   | 0.019 $\pm$ 0.008   | 0.016 $\pm$ 0.006   | 0.014 $\pm$ 0.005   | 0.015 $\pm$ 0.005   | 0.034 $\pm$ 0.014 | 0.032 $\pm$ 0.015 | 0.025 $\pm$ 0.005 | 0.033 $\pm$ 0.011 |
| 3'-Hydroxyhippuric acid                                        | 0.048 $\pm$ 0.046   | 0.034 $\pm$ 0.031   | 0.031 $\pm$ 0.025   | 0.024 $\pm$ 0.018   | 0.021 $\pm$ 0.017   | 0.029 $\pm$ 0.020 | 0.044 $\pm$ 0.032 | 0.062 $\pm$ 0.054 | 0.14 $\pm$ 0.24   |
| 3-Hydroxy-3-(3' -hydroxyphenyl)propanoic acid                  | 0.073 $\pm$ 0.141   | 0.028 $\pm$ 0.060   | 0.033 $\pm$ 0.058   | 0.039 $\pm$ 0.052   | 0.032 $\pm$ 0.055   | 0.025 $\pm$ 0.051 | 0.070 $\pm$ 0.119 | 0.11 $\pm$ 0.18   | 0.38 $\pm$ 0.77   |
| Hippuric acid                                                  | 1.15 $\pm$ 0.49     | 0.76 $\pm$ 0.37     | 0.66 $\pm$ 0.28     | 0.61 $\pm$ 0.22     | 0.58 $\pm$ 0.19     | 0.71 $\pm$ 0.21   | 0.64 $\pm$ 0.24   | 0.67 $\pm$ 0.27   | 1.58 $\pm$ 1.60   |
| 4'-Hydroxyphenylacetic acid                                    | 4.06 $\pm$ 3.71     | 3.69 $\pm$ 3.04     | 3.31 $\pm$ 2.43     | 3.06 $\pm$ 2.09     | 2.71 $\pm$ 1.85     | 3.99 $\pm$ 2.36   | 4.08 $\pm$ 3.30   | 4.18 $\pm$ 3.94   | 4.17 $\pm$ 3.34   |
| 3-(4'-hydroxy-3'-methoxyphenyl)propanoic acid - 4'-sulfate     | 0.007 $\pm$ 0.006   | 0.005 $\pm$ 0.005   | 0.003 $\pm$ 0.003   | 0.002 $\pm$ 0.003   | 0.002 $\pm$ 0.003   | 0.005 $\pm$ 0.005 | 0.006 $\pm$ 0.006 | 0.006 $\pm$ 0.003 | 0.010 $\pm$ 0.008 |
| 3-(4'-hydroxy-3'-methoxyphenyl)propanoic acid - 4'-glucuronide | 0.003 $\pm$ 0.004   | 0.003 $\pm$ 0.004   | 0.002 $\pm$ 0.003   | 0.002 $\pm$ 0.002   | 0.002 $\pm$ 0.002   | 0.003 $\pm$ 0.003 | 0.004 $\pm$ 0.004 | 0.004 $\pm$ 0.003 | 0.006 $\pm$ 0.006 |
| 3-(4'-hydroxy-3'-methoxyphenyl)propanoic acid - 3'-sulfate     | 0.0001 $\pm$ 0.0003 | 0.0002 $\pm$ 0.0005 | 0.0002 $\pm$ 0.0004 | 0.0002 $\pm$ 0.0005 | 0.001 $\pm$ 0.002   | 0.007 $\pm$ 0.008 | 0.029 $\pm$ 0.029 | 0.041 $\pm$ 0.041 | 0.022 $\pm$ 0.036 |
| 3'-hydroxyphenylacetic acid                                    | 3.44 $\pm$ 1.53     | 3.38 $\pm$ 1.36     | 3.24 $\pm$ 1.63     | 2.94 $\pm$ 1.39     | 2.54 $\pm$ 1.01     | 3.20 $\pm$ 1.37   | 3.47 $\pm$ 1.34   | 3.22 $\pm$ 1.15   | 3.37 $\pm$ 1.75   |
| 4' -Hydroxy-3' -methoxyphenylacetic acid                       | 0.24 $\pm$ 0.10     | 0.19 $\pm$ 0.10     | 0.17 $\pm$ 0.08     | 0.16 $\pm$ 0.06     | 0.15 $\pm$ 0.07     | 0.19 $\pm$ 0.09   | 0.19 $\pm$ 0.10   | 0.17 $\pm$ 0.14   | 0.23 $\pm$ 0.11   |
| 3-(3'-hydroxy-4'-methoxyphenyl)propanoic acid - 3'-glucuronide | 0.0001 $\pm$ 0.0001 | 0.0001 $\pm$ 0.0001 | 0.0001 $\pm$ 0.0001 | 0.0001 $\pm$ 0.0001 | 0.0001 $\pm$ 0.0002 | 0.001 $\pm$ 0.001 | 0.002 $\pm$ 0.003 | 0.004 $\pm$ 0.005 | 0.002 $\pm$ 0.002 |
| 3-(3'-hydroxyphenyl)propanoic acid                             | 0.44 $\pm$ 0.17     | 0.46 $\pm$ 0.21     | 0.43 $\pm$ 0.19     | 0.40 $\pm$ 0.21     | 0.35 $\pm$ 0.15     | 0.50 $\pm$ 0.17   | 0.52 $\pm$ 0.15   | 0.49 $\pm$ 0.22   | 0.49 $\pm$ 0.17   |
| 3-(4'-hydroxy-3'-methoxyphenyl)propanoic acid                  | 0.033 $\pm$ 0.036   | 0.026 $\pm$ 0.030   | 0.018 $\pm$ 0.020   | 0.014 $\pm$ 0.015   | 0.015 $\pm$ 0.018   | 0.034 $\pm$ 0.032 | 0.044 $\pm$ 0.036 | 0.035 $\pm$ 0.020 | 0.063 $\pm$ 0.069 |
| 3-(3'-hydroxyphenyl-4'-methoxyphenyl)propionic acid            | 0.004 $\pm$ 0.005   | 0.004 $\pm$ 0.006   | 0.004 $\pm$ 0.006   | 0.010 $\pm$ 0.016   | 0.038 $\pm$ 0.060   | 0.22 $\pm$ 0.24   | 0.70 $\pm$ 0.65   | 0.74 $\pm$ 0.74   | 0.29 $\pm$ 0.52   |
| 3 Phenylpropanoic acid                                         | 0.50 $\pm$ 0.19     | 0.50 $\pm$ 0.24     | 0.43 $\pm$ 0.19     | 0.35 $\pm$ 0.14     | 0.30 $\pm$ 0.12     | 0.49 $\pm$ 0.21   | 0.53 $\pm$ 0.28   | 0.53 $\pm$ 0.28   | 0.72 $\pm$ 0.46   |
| 4' -Methoxycinnamic acid-3' -glucuronide                       | 0.0006 $\pm$ 0.0007 | 0.0005 $\pm$ 0.0005 | 0.0003 $\pm$ 0.0003 | 0.0002 $\pm$ 0.0002 | 0.0003 $\pm$ 0.0003 | 0.001 $\pm$ 0.001 | 0.004 $\pm$ 0.004 | 0.005 $\pm$ 0.005 | 0.006 $\pm$ 0.006 |

Data expressed as mean  $\pm$  standard deviation.

**Table S7.** Concentration of Hesperidin metabolites and catabolites in serum before and after Micronised 2S-Hesperidin (M2SH) ingestion.

| Variable                                                       | 0 h                 | 2 h                 | 3 h                 | 4 h                 | 5 h                 | 6 h                 | 7 h               | 8 h               | 24 h                |
|----------------------------------------------------------------|---------------------|---------------------|---------------------|---------------------|---------------------|---------------------|-------------------|-------------------|---------------------|
| <i>Metabolites, <math>\mu\text{M}</math></i>                   |                     |                     |                     |                     |                     |                     |                   |                   |                     |
| Hesperetin, 7,3,di-O-Glucuronide                               | 0.001 $\pm$ 0.000   | 0.001 $\pm$ 0.000   | 0.001 $\pm$ 0.000   | 0.003 $\pm$ 0.006   | 0.009 $\pm$ 0.012   | 0.016 $\pm$ 0.019   | 0.030 $\pm$ 0.029 | 0.035 $\pm$ 0.024 | 0.007 $\pm$ 0.015   |
| Hesperetin 7-O-Glucuronide                                     | 0.0004 $\pm$ 0.0005 | 0.0005 $\pm$ 0.0009 | 0.002 $\pm$ 0.004   | 0.008 $\pm$ 0.014   | 0.022 $\pm$ 0.033   | 0.032 $\pm$ 0.034   | 0.049 $\pm$ 0.045 | 0.054 $\pm$ 0.043 | 0.009 $\pm$ 0.020   |
| Hesperetin 3-O-Glucuronide                                     | 0.005 $\pm$ 0.010   | 0.003 $\pm$ 0.008   | 0.009 $\pm$ 0.017   | 0.015 $\pm$ 0.032   | 0.041 $\pm$ 0.056   | 0.074 $\pm$ 0.075   | 0.15 $\pm$ 0.14   | 0.18 $\pm$ 0.17   | 0.029 $\pm$ 0.061   |
| Hesperetin 7-O-Sulfate                                         | 0.001 $\pm$ 0.003   | 0.001 $\pm$ 0.001   | 0.003 $\pm$ 0.006   | 0.011 $\pm$ 0.019   | 0.027 $\pm$ 0.043   | 0.055 $\pm$ 0.071   | 0.1 $\pm$ 0.1     | 0.12 $\pm$ 0.12   | 0.023 $\pm$ 0.050   |
| Hesperetin                                                     | 0.0001 $\pm$ 0.0000 | 0.0001 $\pm$ 0.0000 | 0.0001 $\pm$ 0.0000 | 0.0003 $\pm$ 0.0009 | 0.0003 $\pm$ 0.0008 | 0.0006 $\pm$ 0.0014 | 0.001 $\pm$ 0.002 | 0.001 $\pm$ 0.002 | 0.0002 $\pm$ 0.0007 |
| <i>Catabolites, <math>\mu\text{M}</math></i>                   |                     |                     |                     |                     |                     |                     |                   |                   |                     |
| 2-Hydroxy-2-(4' -hydroxy-3' -methoxyphenyl)acetic acid         | 0.027 $\pm$ 0.009   | 0.022 $\pm$ 0.007   | 0.024 $\pm$ 0.005   | 0.025 $\pm$ 0.007   | 0.023 $\pm$ 0.009   | 0.029 $\pm$ 0.006   | 0.028 $\pm$ 0.011 | 0.025 $\pm$ 0.007 | 0.032 $\pm$ 0.009   |
| 4'-Hydroxyhippuric acid                                        | 0.024 $\pm$ 0.009   | 0.017 $\pm$ 0.008   | 0.017 $\pm$ 0.008   | 0.017 $\pm$ 0.009   | 0.015 $\pm$ 0.007   | 0.032 $\pm$ 0.010   | 0.034 $\pm$ 0.013 | 0.028 $\pm$ 0.012 | 0.037 $\pm$ 0.025   |
| 3'-Hydroxyhippuric acid                                        | 0.057 $\pm$ 0.066   | 0.046 $\pm$ 0.044   | 0.043 $\pm$ 0.043   | 0.037 $\pm$ 0.035   | 0.035 $\pm$ 0.037   | 0.045 $\pm$ 0.056   | 0.062 $\pm$ 0.080 | 0.069 $\pm$ 0.065 | 0.13 $\pm$ 0.17     |
| 3-Hydroxy-3-(3' -hydroxyphenyl)propanoic acid                  | 0.11 $\pm$ 0.15     | 0.046 $\pm$ 0.083   | 0.066 $\pm$ 0.167   | 0.069 $\pm$ 0.171   | 0.083 $\pm$ 0.179   | 0.13 $\pm$ 0.22     | 0.12 $\pm$ 0.19   | 0.15 $\pm$ 0.18   | 0.36 $\pm$ 0.57     |
| Hippuric acid                                                  | 1.23 $\pm$ 0.78     | 0.76 $\pm$ 0.49     | 0.73 $\pm$ 0.48     | 0.74 $\pm$ 0.42     | 0.75 $\pm$ 0.38     | 0.85 $\pm$ 0.35     | 0.85 $\pm$ 0.51   | 0.82 $\pm$ 0.61   | 1.39 $\pm$ 0.79     |
| 4'-Hydroxyphenylacetic acid                                    | 2.66 $\pm$ 1.13     | 2.57 $\pm$ 0.99     | 2.68 $\pm$ 1.36     | 2.49 $\pm$ 1.44     | 2.55 $\pm$ 1.24     | 3.69 $\pm$ 1.35     | 3.90 $\pm$ 1.69   | 3.56 $\pm$ 1.37   | 3.34 $\pm$ 1.43     |
| 3-(4'-hydroxy-3'-methoxyphenyl)propanoic acid - 4'-sulfate     | 0.078 $\pm$ 0.258   | 0.016 $\pm$ 0.039   | 0.005 $\pm$ 0.005   | 0.003 $\pm$ 0.004   | 0.003 $\pm$ 0.003   | 0.004 $\pm$ 0.003   | 0.007 $\pm$ 0.006 | 0.008 $\pm$ 0.007 | 0.035 $\pm$ 0.102   |
| 3-(4'-hydroxy-3'-methoxyphenyl)propanoic acid - 4'-glucuronide | 0.005 $\pm$ 0.007   | 0.003 $\pm$ 0.002   | 0.003 $\pm$ 0.002   | 0.002 $\pm$ 0.002   | 0.002 $\pm$ 0.001   | 0.002 $\pm$ 0.002   | 0.004 $\pm$ 0.002 | 0.004 $\pm$ 0.003 | 0.017 $\pm$ 0.050   |
| 3-(4'-hydroxy-3'-methoxyphenyl)propanoic acid - 3'-sulfate     | 0.002 $\pm$ 0.005   | 0.002 $\pm$ 0.006   | 0.002 $\pm$ 0.005   | 0.004 $\pm$ 0.009   | 0.014 $\pm$ 0.025   | 0.028 $\pm$ 0.045   | 0.058 $\pm$ 0.066 | 0.10 $\pm$ 0.07   | 0.028 $\pm$ 0.046   |
| 3'-hydroxyphenylacetic acid                                    | 3.36 $\pm$ 1.51     | 3.25 $\pm$ 1.30     | 3.27 $\pm$ 1.58     | 2.90 $\pm$ 1.46     | 2.61 $\pm$ 1.30     | 3.15 $\pm$ 1.35     | 3.51 $\pm$ 1.55   | 3.46 $\pm$ 1.45   | 2.95 $\pm$ 1.49     |
| 4' -Hydroxy-3' -methoxyphenylacetic acid                       | 0.25 $\pm$ 0.12     | 0.18 $\pm$ 0.11     | 0.16 $\pm$ 0.11     | 0.16 $\pm$ 0.09     | 0.18 $\pm$ 0.10     | 0.20 $\pm$ 0.09     | 0.19 $\pm$ 0.14   | 0.18 $\pm$ 0.13   | 0.28 $\pm$ 0.28     |
| 3-(3'-hydroxy-4'-methoxyphenyl)propanoic acid - 3'-glucuronide | 0.0002 $\pm$ 0.0003 | 0.0002 $\pm$ 0.0004 | 0.0002 $\pm$ 0.0003 | 0.0003 $\pm$ 0.0005 | 0.001 $\pm$ 0.001   | 0.002 $\pm$ 0.003   | 0.004 $\pm$ 0.004 | 0.007 $\pm$ 0.005 | 0.003 $\pm$ 0.003   |
| 3-(3'-hydroxyphenyl)propanoic acid                             | 0.46 $\pm$ 0.22     | 0.47 $\pm$ 0.23     | 0.45 $\pm$ 0.18     | 0.42 $\pm$ 0.18     | 0.38 $\pm$ 0.16     | 0.54 $\pm$ 0.18     | 0.58 $\pm$ 0.19   | 0.54 $\pm$ 0.19   | 0.50 $\pm$ 0.22     |
| 3-(4'-hydroxy-3'-methoxyphenyl)propanoic acid                  | 0.034 $\pm$ 0.029   | 0.029 $\pm$ 0.031   | 0.021 $\pm$ 0.021   | 0.017 $\pm$ 0.017   | 0.017 $\pm$ 0.014   | 0.028 $\pm$ 0.017   | 0.056 $\pm$ 0.050 | 0.053 $\pm$ 0.051 | 0.17 $\pm$ 0.48     |
| 3-(3'-hydroxyphenyl-4'-methoxyphenyl)propionic acid            | 0.009 $\pm$ 0.013   | 0.009 $\pm$ 0.019   | 0.027 $\pm$ 0.073   | 0.10 $\pm$ 0.28     | 0.26 $\pm$ 0.50     | 0.57 $\pm$ 0.94     | 1.09 $\pm$ 1.21   | 1.41 $\pm$ 1.14   | 0.39 $\pm$ 0.73     |
| 3 Phenylpropanoic acid                                         | 0.51 $\pm$ 0.32     | 0.58 $\pm$ 0.37     | 0.51 $\pm$ 0.36     | 0.47 $\pm$ 0.30     | 0.41 $\pm$ 0.27     | 0.56 $\pm$ 0.32     | 0.63 $\pm$ 0.41   | 0.60 $\pm$ 0.38   | 0.71 $\pm$ 0.41     |
| 4' -Methoxycinnamic acid-3' -glucuronide                       | 0.001 $\pm$ 0.002   | 0.001 $\pm$ 0.002   | 0.001 $\pm$ 0.002   | 0.001 $\pm$ 0.001   | 0.002 $\pm$ 0.002   | 0.003 $\pm$ 0.003   | 0.005 $\pm$ 0.004 | 0.007 $\pm$ 0.005 | 0.008 $\pm$ 0.010   |

Data expressed as mean  $\pm$  standard deviation

**Table S8.** Concentration of Hesperidin metabolites plus Hesperidin catabolites (nM) in serum before and after Hesperidin epimeric mixture (HEM), Micronised Hesperidin epimeric mixture (MHEM) and Micronised 2S-Hesperidin (M2SH) treatments.

| Intervention   | Time after ingestion |                       |      |       |                        |                        |                         |                         |                        | P for trend                  |
|----------------|----------------------|-----------------------|------|-------|------------------------|------------------------|-------------------------|-------------------------|------------------------|------------------------------|
|                | Baseline (0 h)       | 2 h                   | 3 h  | 4 h   | 5 h                    | 6 h                    | 7 h                     | 8 h                     | 24 h                   |                              |
| HEM<br>(n=13)  | 126                  | <b>45<sup>*</sup></b> | 41   | 58    | 119                    | <b>448<sup>*</sup></b> | <b>676<sup>†</sup></b>  | <b>766<sup>‡</sup></b>  | <b>624<sup>‡</sup></b> | <b>&lt;0.001<sup>a</sup></b> |
|                | (65)                 | <b>(24)</b>           | (18) | (19)  | (33)                   | <b>(120)</b>           | <b>(142)</b>            | <b>(113)</b>            | <b>(60)</b>            | <b><sup>b</sup> 0.008</b>    |
| MHEM<br>(n=14) | 79                   | 34                    | 40   | 66    | <b>254<sup>†</sup></b> | <b>650<sup>‡</sup></b> | <b>1612<sup>‡</sup></b> | <b>1545<sup>‡</sup></b> | <b>913<sup>†</sup></b> | <b>&lt;0.001<sup>a</sup></b> |
|                | (37)                 | (16)                  | (15) | (16)  | <b>(42)</b>            | <b>(162)</b>           | <b>(354)</b>            | <b>(339)</b>            | <b>(283)</b>           | 0.829                        |
| 2SH<br>(n=13)  | 123                  | 63                    | 111  | 215   | <b>465<sup>*</sup></b> | <b>917<sup>†</sup></b> | <b>1619<sup>‡</sup></b> | <b>2084<sup>‡</sup></b> | <b>854<sup>†</sup></b> | <b>&lt;0.001<sup>a</sup></b> |
|                | (43)                 | (29)                  | (72) | (139) | <b>(217)</b>           | <b>(336)</b>           | <b>(398)</b>            | <b>(327)</b>            | <b>(298)</b>           | 0.840                        |

Data expressed as mean (standard error). Metabolites involved: Hesperetin (Hesp), 7, 3' di-O- glucuronide (gluc)+ Hesp 7-O-gluc + Hesp 3-O-gluc + Hesp 7-O-sulfate+ Hesp. Catabolites involved: isoferulic acid-3'-glucuronide + 3-(3'- hydroxy-4'-methoxyphenyl) propionic acid (Dihydro-isoferulic acid) + 3-(3'- hydroxy 4'-methoxyphenyl) propionic acid-3'-sulfate + 3-(3'- hydroxy 4'-methoxyphenyl) propionic acid-3'-O-glucuronide + 3'-(3'-hydroxyphenyl) hydracrylic acid. General Linear Model with Bonferroni correction. Data log transformed for normalization. <sup>\*</sup> P<0.05, <sup>†</sup> P<0.01, <sup>‡</sup> P<0.001 *versus* baseline. P for trend: <sup>a</sup> linear, <sup>b</sup> quadratic. Significant results in **bold**.

**Table S9.** Concentration of Hesperidin metabolites (nM) in serum before and after Hesperidin epimeric mixture (HEM), Micronised Hesperidin epimeric mixture (MHEM) and Micronised 2S-Hesperidin (M2SH) treatments.

| Intervention   | Time after ingestion |                                          |                |                |                                          |                                         |                                         |                                         |                                         | P for trend                                               |
|----------------|----------------------|------------------------------------------|----------------|----------------|------------------------------------------|-----------------------------------------|-----------------------------------------|-----------------------------------------|-----------------------------------------|-----------------------------------------------------------|
|                | Baseline (0 h)       | 2 h                                      | 3 h            | 4 h            | 5 h                                      | 6 h                                     | 7 h                                     | 8 h                                     | 24 h                                    |                                                           |
| HEM<br>(n=14)  | 1.64<br>(0.25)       | 1.58<br>(0.13)                           | 4.29<br>(2.57) | 20.9<br>(8.10) | <b>63.4</b><br><b>(21.4)</b>             | <b>239<sup>‡</sup></b><br><b>(63.3)</b> | <b>332<sup>‡</sup></b><br><b>(65.1)</b> | <b>361<sup>‡</sup></b><br><b>(58.1)</b> | <b>124<sup>‡</sup></b><br><b>(54)</b>   | <b><sup>a</sup>&lt;0.001</b><br><b><sup>b</sup> 0.173</b> |
| MHEM<br>(n=14) | 1.64<br>(0.24)       | <b>2.29<sup>*</sup></b><br><b>(0.50)</b> | 3.09<br>(0.82) | 16.6<br>(7.8)  | <b>81.9<sup>†</sup></b><br><b>(26.6)</b> | <b>381<sup>‡</sup></b><br><b>(102)</b>  | <b>785<sup>‡</sup></b><br><b>(201)</b>  | <b>635<sup>‡</sup></b><br><b>(144)</b>  | <b>198<sup>†</sup></b><br><b>(73.6)</b> | <b><sup>a</sup>&lt;0.001</b><br><b><sup>b</sup> 0.038</b> |
| 2SH<br>(n=14)  | 6.50<br>(3.50)       | 4.42<br>(2.4)                            | 1.46<br>(7.2)  | 35.9<br>(18.5) | 99.7<br>(37.1)                           | <b>177<sup>‡</sup></b><br><b>(50.8)</b> | <b>329<sup>‡</sup></b><br><b>(81.7)</b> | <b>393<sup>‡</sup></b><br><b>(89.8)</b> | 67.8<br>(38.6)                          | <b><sup>a</sup>&lt;0.001</b><br><b><sup>b</sup>0.002</b>  |

Data expressed as mean (standard error). Metabolites involved: Hesperetin (Hesp), 7, 3' di-O- glucuronide (gluc)+ Hesp 7-O-gluc + Hesp 3-O-gluc + Hesp 7-O-sulfate+ Hesp. General Linear Model with Bonferroni correction. Data log transformed for normalization. <sup>\*</sup> P<0.05, <sup>†</sup> P<0.01, <sup>‡</sup> P<0.001versus baseline. P for trend: <sup>a</sup> linear, <sup>b</sup> quadratic.

**Table S10.** Concentration of Hesperidin catabolites (nM) in serum before and after Hesperidin epimeric mixture (HEM), Micronised Hesperidin epimeric mixture (MHEM) and Micronised 2S-Hesperidin (M2SH) treatments.

| Intervention   | Time after ingestion |      |      |       |       |       |              |              |              | P for trend                  |
|----------------|----------------------|------|------|-------|-------|-------|--------------|--------------|--------------|------------------------------|
|                | Baseline (0 h)       | 2 h  | 3 h  | 4 h   | 5 h   | 6 h   | 7 h          | 8 h          | 24 h         |                              |
| HEM<br>(n=13)  | 124                  | 43   | 37   | 38    | 60    | 215   | 357          | 421          | <b>495*</b>  | <b>&lt;0.001<sup>a</sup></b> |
|                | (65)                 | (25) | (18) | (16)  | (19)  | (67)  | (97)         | (89)         | <b>(80)</b>  | <sup>b</sup> 0.119           |
| MHEM<br>(n=14) | 77                   | 32   | 37   | 49    | 71    | 253   | <b>801*</b>  | <b>903*</b>  | <b>698*</b>  | <b>&lt;0.001<sup>a</sup></b> |
|                | (37)                 | (16) | (15) | (13)  | (22)  | (75)  | <b>(190)</b> | <b>(210)</b> | <b>(235)</b> | 0.124                        |
| 2SH<br>(n=13)  | 119                  | 59   | 96   | 177   | 358   | 718   | <b>1281*</b> | <b>1672*</b> | 782          | <b>&lt;0.001<sup>a</sup></b> |
|                | (43)                 | (27) | (67) | (126) | (193) | (317) | <b>(390)</b> | <b>(348)</b> | (282)        | 0.413                        |

Data expressed as mean (standard error). Catabolites involved: isoferulic acid-3'-glucuronide + 3-(3'- hydroxy- 4'-methoxyphenyl) propionic acid (Dihydro-isoferulic acid) + 3-(3'- hydroxy 4'-methoxyphenyl) propionic acid-3'-sulfate + 3-(3'- hydroxy 4'-methoxyphenyl) propionic acid-3'-O-glucuronide + 3'-(3'-hydroxyphenyl) hydracrylic acid . General Linear Model with Bonferroni correction. Data log transformed for normalization.\* P<0.05 *versus* baseline. P for trend: a linear, <sup>b</sup> quadratic. Significant results in **bold**.
